1                   **Split *Staphylococcus aureus* prime editor for AAV delivery**

2

3 Eric J. Aird<sup>1,2</sup>, Alina C. Zdechlik<sup>1,2</sup>, Brian L. Ruis<sup>1,2</sup>, Colette B. Rogers<sup>1,2</sup>, Andrew L.  
4 Lemmex<sup>1,2</sup>, Andrew T. Nelson<sup>1,2</sup>, Eric A. Hendrickson<sup>1,2</sup>, Daniel Schmidt<sup>2,3</sup>, and Wendy  
5 R. Gordon<sup>1,2\*</sup>

6

7 <sup>1</sup>Department of Biochemistry, Molecular Biology, and Biophysics, University of  
8 Minnesota, Minneapolis, MN, USA

9 <sup>2</sup>Center for Genome Engineering, University of Minnesota, Minneapolis, MN, USA

10 <sup>3</sup>Department of Genetics, Cell Biology, and Development, Minneapolis, MN, USA

11

12

13 \*Correspondence should be addressed to W.R.G. ([wrgordon@umn.edu](mailto:wrgordon@umn.edu))

14

15

16 Keywords: CRISPR, prime editing, AAV, delivery, *Staphylococcus aureus*

17 **Abstract**

18 Prime editing brings immense promise to correct a large number of human pathogenic  
19 mutations and enact diverse edit types without introducing widespread undesired editing  
20 events. Delivery of prime editors in vivo would enable such edits to be introduced in a  
21 clinical setting. The coding sequence for prime editor, however, is too large to fit within  
22 the size-constrained adeno-associated virus (AAV) genome. Herein, we describe a split  
23 *Staphylococcus aureus* prime editor capable of being delivered by dual AAVs. We  
24 characterize the editing ability of plasmid-based versions of an *S. aureus* prime editor in  
25 vitro at a variety of loci with diverse edit types. We investigate various split prime editor  
26 architectures and alternative dimerization domains. Finally, we demonstrate the capacity  
27 of prime editor to be co-delivered by dual AAVs in vitro. While editing rates are lower than  
28 desired, this approach presents an important step to translate prime editing for in vivo  
29 delivery.

## 30 **Introduction**

31           Genome editing has brought incredible promise to correct or ameliorate previously  
32           untreatable genetically linked diseases such as Tay-Sachs disease or Phenylketonuria  
33           (PKU). The use of programmable nucleases such as CRISPR-Cas9 that introduce a DNA  
34           double-stranded break (DSB) enables precise gene editing at a desired locus<sup>1,2</sup>.  
35           Traditionally, homology-directed repair (HDR) has been the only means to introduce  
36           precise nucleotide changes at a DSB via the supplementation of a donor DNA molecule  
37           encoding the changes. HDR, however, usually occurs less frequently than the  
38           circumstantially undesired non-homologous end joining (NHEJ) pathway<sup>3</sup>. To circumvent  
39           the NHEJ pathway, base editors were designed to change single bases in DNA without  
40           the need to create a DSB<sup>4</sup>. Base editors employ nickase Cas9s that have one of the  
41           nuclease domains mutated to prevent cleavage on one DNA strand. Base editors, as the  
42           name suggests, are limited to introducing transition point mutations (purine:purine or  
43           pyrimidine:pyrimidine), although recently C to G base editors have been characterized<sup>5,6</sup>.  
44           While NHEJ levels are low with base editors and high rates of precise editing can be  
45           achieved, the restraint on editing type and inability to edit specific bases within a window  
46           makes it not ideal for many desired precise genome editing applications.

47           The latest advent in CRISPR genome editing technologies is prime editor, which  
48           is capable of introducing a wide range of precise modifications without the need for DSB  
49           formation<sup>7</sup>. Like base editor, prime editor utilizes a Cas9 (H840A) nickase. A reverse  
50           transcriptase (RT) is tethered to the nickase while a prime editing guide RNA (pegRNA)  
51           contains a 3' extension serving as both the genome hybridizing site (primer binding site;  
52           PBS) and the RT template encoding the desired edits. Prime editor cleaves the single

53 strand of DNA, the PBS of the pegRNA hybridizes with the newly exposed ssDNA, and  
54 the RT synthesizes from the RT template. Flap resolution and DNA mismatch repair then  
55 allow for incorporation of the desired modification. Therefore, prime editing is theoretically  
56 able to make edits downstream of the nick site, termed the +1 site. Prime editor was  
57 shown to allow for edits ranging from codon changes to small insertions and deletions  
58 through encoding these modifications in the 3' pegRNA extension<sup>7</sup>. Hypothetically, prime  
59 editor is capable of correcting close to 90% of human pathogenic mutations<sup>7</sup>. As with  
60 other types of genome editing technologies, however, in vivo targeting and delivery  
61 remains a large hurdle to overcome to achieve such a goal<sup>8</sup>.

62 Adeno-associated virus (AAV) is the most common in vivo delivery vehicle for gene  
63 editing reagents. AAV contains a single-stranded DNA (ssDNA) genome that can be  
64 replaced with transgenes of interest. The virus can target a wide range of tissue and cell  
65 types with a relatively low immunogenicity profile. AAV-mediated delivery of CRISPR-Cas  
66 has been successfully deployed to produce indels<sup>9</sup>, create chimeric T-cell receptors<sup>10</sup>,  
67 and generate large deletions<sup>11</sup>. Extensive engineering efforts have also modified the virus  
68 to enhance cell-specific delivery or decrease immunogenicity<sup>12</sup>. A major constraint of AAV  
69 is the maximum size of its ssDNA genome, roughly 4.7 kb not including the two flanking  
70 inverted terminal repeats (ITRs)<sup>13</sup>. The conventional Cas9 originating from *S. pyogenes*  
71 (SpCas9) is 4.2 kb in size, allowing little space for necessary regulatory elements such  
72 as promoters and terminators and precludes encoding of a gRNA expression cassette in  
73 the same genome. To overcome this limitation, smaller orthologs of Cas9 such as from  
74 *S. aureus* (SaCas9) have been utilized<sup>14</sup>. The gene length of SaCas9 is approximately 1  
75 kb shorter than SpCas9 allowing for more freedom in packaging in AAV. Another strategy

76 to deliver full-length Cas proteins has been to split the protein into two AAV vectors to be  
77 co-delivered. This approach can take place on the DNA, RNA, or protein level (reviewed  
78 in <sup>15</sup>). On the protein level, engineered split trans-splicing inteins can be co-opted  
79 essentially as dimerization domains to bring two halves of a split protein together<sup>16</sup>. For  
80 base editor to be packaged and delivered by AAV, a split base editor, split intein system  
81 was used<sup>17,18</sup>. The two intein halves associate at low nM affinity and swiftly excise  
82 themselves out, leaving only a small scar. For both SpCas9 and SaCas9, various groups  
83 have identified numerous permissible split locations that allow the proteins to retain nearly  
84 full activity once recombined<sup>18,19</sup>.

85 Prime editor was previously shown to be delivered ex vivo using a three-part  
86 lentivirus system to mouse primary cortical neurons<sup>7</sup>. This approach, however, is not  
87 broadly applicable in the clinic due to constraints on choice of cell type to edit.  
88 Ribonucleoprotein (RNP)-containing lentiviral particles have been used to transiently  
89 deliver Cas9<sup>20</sup>, but the sheer size of prime editor protein (~250 kDa) makes it difficult to  
90 produce conventionally in *E. coli* and package. Ideally, AAV would be used to deliver  
91 prime editor. At ~6.4 kb, prime editor is too large to be encoded into a single AAV genome.  
92 Even when constituted as a split version, prime editor is unable to fit into two AAV  
93 genomes with the necessary regulatory elements and the pegRNA expression cassette.

94 To address this size constraint issue, we developed a new version of prime editor  
95 using SaCas9(N580A) as the guided nickase. We demonstrate that *S. aureus* prime  
96 editor (SaPE) can also introduce targeted changes to a wide range of genomic loci from  
97 point mutations to larger deletions. We assessed three different split locations in concert  
98 with split intein and split NanoLuc approaches to reconstruct full-length, active protein. All

99 versions of split SaPE were capable of inducing editing events, although they tended to  
100 be less efficient than the full-length protein. The split version can be packaged into two  
101 standard size AAV genomes and be delivered in viral form in vitro. This work opens a  
102 potential avenue for in vivo and clinical exploration of prime editing.

103

## 104 **Results**

### 105 *Development of an S. aureus prime editor*

106 As SaCas9 and SpCas9 share similar domain architecture, we reasoned that a  
107 nickase SaCas9 could serve as a sufficient nicking nuclease to be combined with the  
108 prime editing methodology. We generated the analogous HNH domain mutation in  
109 SaCas9 (N580A) as in SpCas9 (H840A) and tethered a reverse transcriptase to create  
110 an *S. aureus* prime editor, SaPE (**Figure 1a**). The previously engineered version of  
111 Moloney murine leukemia virus reverse transcriptase (eMMLV-RT) was utilized<sup>7</sup>. We then  
112 sought to create a split version of SaPE capable of fitting into two AAV genomes.  
113 Numerous methods have been applied to efficiently recombine split portions of Cas9<sup>21,22</sup>.  
114 We utilized a split intein-mediated approach wherein the split Npu trans-splicing intein  
115 from *Nostoc punctiforme* was appended onto the N- and C-termini of split SaPE<sup>23</sup> (**Figure**  
116 **1a**). We trialed three different split locations in SaCas9, all of which have been previously  
117 reported<sup>18,19</sup>. Two of the split locations, E739/S740 (version 1) and K534/C535 (version  
118 3), showed reasonable intein splicing in cells (**Figure 1b**).

119 To more quickly test editing conditions, we created a stably integrated fluorescent  
120 reporter cell containing a point mutation in *GFP(L202S)* that ablates GFP fluorescence  
121 linked to mKate2 via a 2A self-cleaving peptide<sup>24</sup> (**Figure 1c**). The restoration of GFP

122 fluorescence through a +6 G to A transition point mutation can readily be detected using  
123 microscopy or flow cytometry (**Figure 1d**). We first tested full-length and split versions of  
124 SaPE alongside a variant with the RT tethered to the amino terminus of nSaCas9 (PESa).  
125 In comparison with SpPE, SaPE had an 8-fold reduction in editing efficiency (**Figure 1e**).  
126 While SaPE editing efficiencies were low at around 0.5%, all split versions had  
127 comparable levels to full-length SaPE. These low editing frequencies with SaPE, as  
128 elaborated on in the Discussion, are a trend that generally holds true at most loci.  
129 Decreases in editing efficiency might be attributed to, among other factors, shorter  
130 residency time of SaPE on the DNA as opposed to SpPE<sup>25</sup>. Nonetheless, detectable  
131 levels of prime editing driven by SaPE are observed.

132 Prime editing necessitates optimization of the pegRNA 3' extension design as both  
133 the RT template and primer binding site (PBS) lengths appear to be edit type and locus  
134 dependent<sup>7,26,27</sup>. At the *GFP(L202S)* locus, we interestingly observed little difference in  
135 editing frequencies when sampling altered 3' extension designs (**Figure 1f**). Variation did  
136 exist among the three split versions, and in these sets of experiments, split SaPE had  
137 noticeable decreased editing frequencies compared to full-length. Combined with the  
138 intein splicing and editing profiles, we carried forward predominantly with version 3 of  
139 sSaPE (K534/C535).

140 In another fluorescent assay targeting a different locus in *GFP*, we once again  
141 compared SpPE to SaPE. A two amino acid change in GFP (T65S-Y66H) converts the  
142 fluorescence to BFP<sup>28</sup>. When prime editing reagents were transfected in HEK-293 cells  
143 stably expressing GFP, we observed a similar frequency of editing between full-length  
144 and split SaPE (1.85% versus 2.45%) (**Figure 1g**). This was again lower than SpPE

145 (3.6%) but to a lesser degree than *GFP(L202S)* where SpPE editing was almost an order  
146 of magnitude higher. Conversion to BFP was also seen in HCT-116 cells to a similar  
147 degree as in HEK-293 cells (**Supplementary Figure 1**). Interestingly, PAM sequence  
148 constraints required this edit to be upstream from the nick site (-1 site) in addition to a +2  
149 point mutation. The ability of prime editor to make modifications upstream of the predicted  
150 nick site, 3 bp away from PAM, lends itself to past research suggesting Cas9 also can  
151 cleave 4 bp upstream<sup>29</sup>. While this effect might be locus dependent, we observed  
152 appreciable editing and potentially a broadened capability of prime editor.

153

#### 154 *Optimization of split SaPE*

155 To try increasing editing frequencies at the *GFP(L202S)* locus with SaPE, we next  
156 sought to optimize experimental parameters and platform design. We performed a  
157 titration of plasmid DNA concentration using lipofection while the molar ratio of  
158 PE:pegRNA was held constant. Due to the PE vectors being approximately three times  
159 the size of the pegRNA plasmids in bp, this resulted in a 3:1 ng of DNA concentration  
160 ratio. The maximal editing of ~0.6% was seen at surprisingly the lowest concentration of  
161 DNA. (**Supplementary Figure 2**). In the case of sSaPEv3, higher DNA concentrations  
162 resulted in roughly a 33% decrease in editing efficiency. Cytotoxicity associated with large  
163 plasmids combined with excess amounts of DNA could be a cause of this trend<sup>30</sup>.

164 Next, two previously described linkers were installed in place of the built-in one  
165 between nSaCas9 and RT to try enhancing editing rates: XTEN<sup>31</sup>, found in base editors,  
166 and (H4)<sub>2</sub>, a rigid alpha helical linker of the sequence [A(EAAAK)<sub>4</sub>A]<sub>2</sub><sup>32</sup>. While the XTEN  
167 linker performed as well as the original SaPE linker, the replacement with the (H4)<sub>2</sub> linker



168 ablated prime editing (**Supplementary Figure 2**). This difference highlights the crucial,  
169 but often ignored, impact of spatial orientation of components in fusion proteins. Further  
170 exploration of linkers and different permissible fusion locations of RT on nCas9 could be  
171 carried out to try optimizing this key parameter.

172 Another approach we utilized to try boosting editing rates was to employ the 3<sup>rd</sup>  
173 generation prime editor system, termed PE3<sup>7</sup>. PE3 uses a 2<sup>nd</sup> gRNA that nicks the non-  
174 prime edited strand to encourage DNA repair machinery to preferentially repair the nicked  
175 strand once the desired edit has been incorporated. The hypothesis is to push the  
176 equilibrium of flap resolution and DNA repair towards the desired outcome, a method  
177 successfully used in base editors<sup>4</sup>. Due to the limited number of SaCas9 PAM motifs in  
178 the vicinity of the targeted location in *GFP(L202S)*, we could only assess two PE3 gRNAs  
179 in combination with SaPE. Use of either gRNA, which nick at -70 or -51 bp from the +1  
180 site, resulted in lower editing efficiencies for sSaPEv3 (**Supplementary Figure 2**). For  
181 sSaPEv1, the -51 gRNA caused a dramatic tripling in editing efficiency (0.20% to 0.67%)  
182 while the -70 gRNA had little effect. PE3 has been shown to be moderately successful at  
183 improving prime editing at other loci with SpPE<sup>7,33</sup>. We chose, however, not to generally  
184 pursue the PE3 approach at other loci due to the limited amount of neighboring PAM  
185 sequences available. Taken together, our efforts to optimize SaPE did little to improve  
186 editing rates from the outset in the context of the *GFP(L202S)* locus.

187

### 188 *Broad assessment of SaPE*

189 We next wanted to assess SaPE and sSaPEv3 across a wide range of loci and  
190 editing types while also changing the lengths of the 3' extension components of pegRNA.

191 Using next-generation sequencing, we found SaPE capable of making wide-ranging  
192 precise changes to target loci (**Figure 2**). In sampling different RT template and PBS  
193 lengths at the *EMX1* locus in a +6 G to T transversion point mutation, we found variable  
194 editing rates between 0.3% and 2.1% for full-length SaPE (**Figure 2a**). For split SaPE,  
195 less variability existed, but editing rates were limited to between 0.3% and 0.5%. Split  
196 SaPE tended to have a decreased editing frequency across all loci tested, a trend that is  
197 not uncommon with split Cas9<sup>21,34</sup> but is in contrast to what was observed with split base  
198 editor<sup>18</sup>. At both the *FANCF* and *DNMT3B* loci, editing rates peaked around 0.4% for a  
199 range of point mutations, insertions, and deletions (**Figure 2b and c**). Point mutations,  
200 however, tended to yield higher editing efficiencies than insertion or deletions. In varying  
201 the RT template length at *RUNX1*, the longer length (15 nt) yielded improved editing over  
202 the shorter RT template (10 nt), regardless of the location of the edit from the nick site  
203 (**Figure 2d**). In the case of the further +7 G to A mutation, a 10 nt RT template resulted  
204 in nearly undetectable levels of editing.

205 The highest prime editing frequencies were seen at the *HEK3* locus, where a +3  
206 C to A transversion was formed in 9.2% of full-length SaPE transfected loci and nearly  
207 5% in the sSaPEv3 condition (**Figure 2e**). At the same target site, a series of 5mer  
208 deletions were encoded in the pegRNA, ranging from 5 to 25 bp in length. Editing  
209 frequencies were 1.9% and 1% for SaPE and sSaPEv3, respectively, for a 5 bp deletion  
210 (**Figure 2f**). These rates decreased as the deletion length increased. 25 bp deletions were  
211 still detected, albeit at a lower frequency than other deletion lengths.

212 We repeated some of the above experiments in U2-OS cells to explore cell type  
213 dependency. Overall, no trend emerged in regard to predicting optimal editing frequency

214 at a given target locus, edit type, and pegRNA design. Editing efficiencies were in the  
215 single digits across all loci assayed, although the *HEK3* locus offers promise moving  
216 forward.

217

### 218 *Altering the dimerization domain*

219 Following extensive characterization of the editing frequencies, we aimed to better  
220 understand the split protein recombination requirements. To visualize reassociation of  
221 split SaPE, we replaced the Npu split intein with split NanoLuc (**Figure 3a**). Split NanoLuc  
222 (sNanoLuc, sNL), with a  $K_D$  of 700 pM, is comprised of an 18 kDa N-terminal fragment,  
223 LgBiT, and a 13 amino acid C-terminal portion, HiBiT<sup>35</sup>. When co-transfecting the two  
224 halves of sSaPE-sNanoLuc, we saw extensive nuclear reconstitution of NanoLuc in a vast  
225 majority of cells using bioluminescence microscopy (**Figure 3b**). Similar editing rates to  
226 sSaPEv3 were also seen, indicating that sNanoLuc is sufficient to act as a dimerization  
227 domain in the context of SaPE (**Figure 3c**). The lack of requiring covalent association of  
228 the two halves of SaPE was further evaluated by utilizing a catalytically inactive version  
229 of the Npu intein (C1A). In these constructs, the two intein components can associate but  
230 not self-splice. No covalent full-length SaPE is formed, yet editing rates are on par with  
231 the catalytically active intein version (**Figure 3c and d**). This data further validated that  
232 covalent association of the two halves of split SaPE is not required to reconstitute active  
233 SaPE. The use of sNanoLuc also offers a convenient system in which visual confirmation  
234 of recombined SaPE is possible, an approach which can be utilized with AAV delivery.

235

### 236 *Packaging and delivery of SaPE in AAV*

237           Next, we cloned the N- and C-terminal portions of sSaPE versions 1 and 3 into  
238 AAV genomes containing flanking ITRs. For N-terminal sSaPE, two orientations of the U6  
239 promoter-pegRNA cassette were tested, either in tandem or in reverse alignment to the  
240 protein expression cassette (**Figure 4a**). The C-sSaPEv3 AAV genome is 4.8 kb in length  
241 while the N-terminal genomes are approximately 3.5 kb. Before packaging into virus, AAV  
242 plasmids were co-transfected targeting *GFP(L202S)* to ensure editing still occurred in the  
243 different context. Indeed, editing rates were in line with previous plasmid designs, even  
244 with a co-transfection as opposed to a triple transfection (**Figure 4b**). Next, AAV-DJ was  
245 packaged and titered using qPCR, yielding  $\sim 2 \times 10^{10}$  viral genome copies (g.c.)/ $\mu$ l. A  
246 control transduction with tdTomato as the encoded genome exhibited robust delivery and  
247 fluorescent protein expression in HEK-293T cells (**Supplementary Figure 4**), ensuring  
248 proper production and purification of the virus. We co-transduced sSaPE AAVs in  
249 *GFP(L202S)* HEK-293T cells and first assessed protein recombination. At both three and  
250 five days post-transduction, full-length recombined protein was evident via western blot  
251 (**Figure 4c**). Assessing GFP fluorescence restoration in *GFP(L202S)*, we see a  
252 concentration dependent increase in editing (**Figure 4d**). While the GFP restoration  
253 frequency is low, co-delivery of sSaPEv3-sNanoLuc AAVs in these cells also showed a  
254 low number of cells expressing recombined protein, potentially due to a low co-  
255 transduction efficiency (**Supplementary Figure 4**). However, co-transduction in U2-OS  
256 cells resulted in an order of magnitude increase in delivery and recombination efficiency  
257 as visualized by bioluminescence microscopy (**Figure 4e**). Taken together, we have  
258 begun the proof of concept work necessary to allow prime editor to be delivered via dual  
259 AAVs for potential future clinical applications.

## 260 Discussion

261 We have demonstrated that an *S. aureus* prime editor presents a platform upon  
262 which in vivo prime editing can occur. While the editing rates we achieved in vitro were  
263 overall low (typically 0.5 to 1%) and not likely to be effective for many diseases, this  
264 approach offers a starting point to further refine and improve. It is important to note that  
265 comparably poor prime editing rates, albeit in plants and protoplasts, were seen in other  
266 published reports with SpPE<sup>26,33</sup>. Multiple engineering approaches can be undertaken to  
267 increase the efficiency of the system. To enhance activity with SaCas9, directed evolution  
268 of MMLV-RT could be employed to increase activity on pegRNA:R-loop DNA in a method  
269 akin to a recently evolved adenosine base editor<sup>36</sup>. A circularly permuted version of  
270 SaCas9 to facilitate the optimal RT fusion location could also be created, similar to what  
271 was also performed with base editors<sup>37</sup>, to increase access to the R-loop DNA. Another  
272 reason SaCas9 might have diminished prime editing rates could be attributed to a  
273 decreased residency time on the DNA target<sup>25</sup>. Chemically or genetically disrupting  
274 factors involved in removing Cas9 from genomic DNA has been successful at increasing  
275 other Cas9-fused effector functions. In one such study, genetic knockdown of the histone  
276 chaperone FACT increased Cas9 residence on DNA and led to improved epigenetic  
277 marking and CRISPRi<sup>38</sup>. It is also interesting to note that using the sSaPE-sNanoLuc  
278 platform, we see that the construct is being expressed in a majority of the cells (**Figure**  
279 **3b**). A recent study examining pegRNA design principles does provide insight into optimal  
280 pegRNA design, although how well it translates to SaPE remains to be seen<sup>39</sup>. Further  
281 investigation, aided by the preceding suggestions, is warranted into studying the  
282 underlying reasons behind the disconnect between expression and prime editing.

283 A downside of SaCas9 is the more limited reach in genomic space with a longer  
284 PAM sequence of NNGRRT. This limitation is especially relevant as mutations further  
285 away from the +1 site tended to have lower editing rates. However, iterations such as  
286 SaCas9 (KKH) have lessened the PAM specificity (PAM = NNNRRT)<sup>40</sup>. Such codon  
287 changes could feasibly be incorporated to SaPE to expand the targeting range.  
288 Additionally, SaPE is a less ideal system for a PE3 type system, wherein a second gRNA  
289 nicks the non-editing strand to encourage the desired editing outcome, due to the stricter  
290 PAM specificity. A less stringent PAM could aid in a broader exploration of PE3 with  
291 SaPE.

292 Once we are able to demonstrate in vitro AAV delivery of sSaPE, the next phase  
293 will be to test in vivo. The ultimate goal is to perform delivery using targeted delivery  
294 approaches such as HUH-AAV<sup>41</sup>. This could have the advantage of decreasing the  
295 necessary administered dose, potentially limiting immunogenicity, and alleviating non-  
296 target cell editing concerns. In conclusion, this work provides a baseline platform for prime  
297 editor to be delivered in vivo. Through making an *S. aureus* prime editor and combining  
298 with trans splicing intein technology, we are able to package prime editor into dual AAVs  
299 for delivery. The anticipated engineering advances that will be made with prime editing  
300 components, such as increased DNA residency time or enhanced RTs, can readily be  
301 incorporated into this platform to increase editing efficiencies and move prime editing  
302 towards the clinic.

## 303 **Methods**

304 *Nucleotide and amino acid sequences*

305 The following tables contain sequences for pegRNAs (**Supplementary Table 1**),  
306 sequencing primers (**Supplementary Table 2**), and proteins (**Supplementary Table 3**).  
307 All oligonucleotides were synthesized by Integrated DNA Technologies (IDT).

308

### 309 *Cloning and DNA assembly*

310 All prime editor expression vectors were generated using NEBuilder HiFi DNA assembly  
311 (New England Biolabs; NEB). The pegRNA expression vectors were generated as  
312 described below from Addgene plasmid #132777 (Generously provided by David Liu).  
313 AAV expression vectors were generated using NEBuilder HiFi DNA assembly combined  
314 with standard restriction digestion of the AAV vector backbone pAAV-CAG-GFP  
315 containing standard AAV2 ITRs. The *S. pyogenes* prime editor expression vector was a  
316 gift from David Liu (Addgene #132775). *S. aureus* Cas9 was amplified from a vector  
317 courtesy of Feng Zhang (Addgene #61591). Q5 site directed mutagenesis (New England  
318 Biolabs) was used to generate the Npu (C1A) mutation. Assembly reactions were  
319 transformed into competent Stellar cells (Takara Bio). Plasmid DNA was purified either  
320 as minipreps (Qiagen) or maxipreps (Thermo Fisher). DNA concentration was quantified  
321 using a Nanodrop (Thermo Fisher) and sequenced verified by Sanger sequencing  
322 (Genewiz).

323

### 324 *pegRNA cloning*

325 The pegRNAs were cloned using a protocol adapted from the Liu lab<sup>7</sup>. These  
326 modifications were made to incorporate the *S. aureus* gRNA scaffold sequence and to  
327 add some streamlined features in regard to vector digestion and golden gate assembly

328 cycling conditions. A detailed protocol is provided in **Supplementary Note 1**. For *S.*  
329 *aureus* pegRNAs, the annealing protospacer oligonucleotides were designed as such:  
330 Forward (CACC ...[G] [spacer sequence]... GTTTT) and reverse (TACTAAAAC ...[reverse  
331 complement] [C]...). Add a G prior to spacer sequence if it doesn't begin with a G (and  
332 corresponding C on the reverse oligonucleotide). The pegRNA 3' extension annealing  
333 oligonucleotides were designed as such: Forward (GAGA ...[RT template + PBS]...) and  
334 reverse (AAAA ...[reverse complement]...). The phosphorylated scaffold oligonucleotides  
335 were: Forward (/5Phos/ agtactctggaaacagaatctactaaaacaaggcaaaatgc  
336 cgtgtttatctcgtcaacttggtggc) and reverse (/5Phos/ tctcgccaacaagtt  
337 gacgagataaacacggcattttgccttgtttagtagattctgtttccagag). Golden gate  
338 assembly was performed with 1 µl each of 1 µM stocks of these 3 annealed  
339 oligonucleotides, 250 ng of pU6-pegRNA-RFP acceptor (Addgene #132777, courtesy of  
340 David Liu), 1 U of BsaI-HFv2 (NEB), 1 U of T4 DNA ligase (NEB), and 1x T4 DNA ligase  
341 buffer in 10 µl total volume. Reaction conditions were as follows: 10 cycles of 5 min at 37  
342 °C and 10 min at 16 °C followed by inactivation steps of 5 min at 55 °C and 5 min at 85  
343 °C. 1 µl of the assembly reaction was transformed into competent Stellar cells. Non-red  
344 colonies were picked for subsequent DNA isolation.

345

#### 346 *Cell culture*

347 HEK-293T, U2-OS, HCT116, RPE1, and HEK-293 cells were cultured in DMEM (Corning)  
348 supplemented with 10% FBS (Gibco) and 0.5% penicillin/streptomycin (Gibco). Cells  
349 were incubated at 37°C in 5% CO<sub>2</sub>. Bxb1-mediated recombination was used to generate  
350 the stable, single copy GFP(L202S)-2A-mKate2 HEK-293T cell line<sup>42</sup>.



351  
352 *Plasmid transfection*  
353 Cells were seeded in a 48-well plate at 30,000 cells per well or in a 24-well plate at 60,000  
354 cells per well. Approximately 24 hr post-seeding, cells were transfected using  
355 Lipofectamine 2000 (Invitrogen). A 1:1 molar ratio of prime editor to pegRNA vector was  
356 used (250:83 ng in 48-well plates or 500:167 ng in 24-well plates) according to the  
357 suggested manufacturer's protocol. For split prime editor transfections, the total amount  
358 of prime editor vector was held constant. Cells were incubated for 72 hr post-transfection  
359 for all downstream analyses.

360  
361 *Analysis of reversion of GFP L202S mutation*  
362 Flow cytometry analysis was carried out on a BD Fortessa X-20 instrument at the  
363 University of Minnesota Flow Cytometry Resource. Cells were prepared by first washing  
364 the cells with PBS and detaching with Accutase (Sigma). Cells were gently pelleted,  
365 washed with ice-cold PBS, and resuspended in ice-cold PBS supplemented with 5% FBS.  
366 Data from 10,000 to 100,000 cells was collected using BD FACSDiva software and  
367 compiled using FlowJo (version 10.6). Cells were initially gated based on FSC-A and  
368 SSC-A (for live cells) and then gated on FSC-W versus FSC-H (for single cells). The  
369 presence or lack of GFP expression was then evaluated (**Supplementary Note 2**).

370 In separate experiments, live cell imaging was carried out on an Olympus IX83  
371 inverted microscope equipped with an Andor iXon Ultra 888 EM-CCD. Fluorescence was  
372 provided by a Sola light engine (Lumencor). For bioluminescence imaging, a Semrock

373 light filter FF01-460/60 was used to capture NanoLuc emission. Images were processed  
374 using Fiji (version 1.51r).

375

#### 376 *Next generation sequencing*

377 Genomic DNA was isolated 72 hr post-transfection using the Quick-DNA Miniprep Plus  
378 kit (Zymo Research) and eluted into 25  $\mu$ l 10 mM Tris-HCl, pH 8. A 150-250 bp region  
379 encompassing each targeted locus was PCR amplified from  $\sim$ 40 ng genomic DNA with  
380 ends containing partial Illumina adapter sequences using CloneAmp HiFi PCR (Takara).  
381 Reaction conditions were as follows: 98  $^{\circ}$ C for 1 min, then 30 cycles of 98  $^{\circ}$ C for 10 sec,  
382 55  $^{\circ}$ C for 10 sec, and 72  $^{\circ}$ C for 5 sec. 1  $\mu$ l of each unpurified amplicon was then carried  
383 to a second PCR reaction using KAPA HiFi Library Amp (Roche Sequencing). NEBNext  
384 Multiplex Oligos (New England Biolabs) were used to add single indexes to the  
385 amplicons. Reaction conditions were as follows: 10 cycles of 98  $^{\circ}$ C for 20 sec, 61  $^{\circ}$ C for  
386 15 sec, and 72  $^{\circ}$ C for 15 sec. 2  $\mu$ l of each common amplicon were pooled and gel purified  
387 from a 1.5% agarose gel (Nucleospin clean-up, Takara Bio), eluting in 35  $\mu$ l 10 mM Tris-  
388 HCl, pH 8. Common amplicon libraries were quantified with qPCR using NEBNext Library  
389 Quant kit (New England Biolabs) and pooled to equal concentrations. Sequencing was  
390 performed with an Illumina MiSeq with 2 x 150 bp paired-end reads (Genewiz).  
391 Sequencing reads were demultiplexed and analyzed using CRISPResso2 in batch  
392 mode<sup>43</sup>.

393

#### 394 *GFP to BFP editing*

395 HEK-293 cells stably expressing GFP were plated at 200,000 cells per well 24 hr prior to  
396 transfection. 250 ng of prime editor, 100 ng of pegRNA, and 50 ng of mCherry plasmid  
397 was then transfected using Lipofectamine 3000 (Invitrogen). For PE3 experiments, 100  
398 ng of gRNA was also added. Cells were then incubated for 72 hr and analyzed using flow  
399 cytometry, gating for mCherry and BFP positive.

400

#### 401 *PIGA editing*

402 *PIGA*<sup>-</sup> cell lines (HCT116 clone #2D2 or RPE1 clone #1A10) were co-transfected with  
403 500 ng pegRNA plasmid and 1.5 µg DNA of full-length SaPE or 750 µg each of split SaPE  
404 plasmids. 1x10<sup>6</sup> cells were electroporated using the Neon Transfection System (1530 V,  
405 10 ms, 3 pulses, 10 µL tips). Transfected cells were transferred to prewarmed media in  
406 10 cm plates and incubated for 72 hours prior to collection for downstream analysis.

407

#### 408 *Western blot*

409 Lysates were collected 72 hr post-transfection from HEK-293T cells in 24-well plates  
410 using RIPA buffer containing protease inhibitors. One third volume of each lysate was  
411 electrophoresed on a 4-20% SDS-PAGE gel and transferred to a nitrocellulose blot. The  
412 blot was blocked in 5% milk in TBS-T then incubated overnight at 4 °C with 1:1000  
413 dilutions of primary antibody. Primary antibodies used were mouse anti-FLAG M2 (F1804;  
414 Sigma) or the loading control mouse anti-β-tubulin (T8328; Thermo Fisher). Blots were  
415 washed and then incubated for 1 hr with 1:10000 goat anti-mouse IgG-HRP (62-6520;  
416 Invitrogen). Blots were imaged using chemiluminescent buffer (Perkin Elmer) on an  
417 Amersham 600 UV imager (GE Healthcare).

418

419 *AAV production*

420 All viral vectors used in this study were generated by the University of Minnesota Viral  
421 Vector and Cloning Core (Minneapolis, MN). Briefly, AAV293 cells at 60% confluence  
422 were transfected with 600 µg of DNA (viral shuttle vector encoding the payload, helper  
423 plasmid, rep/cap plasmids at 1:1:1 ratio) using polyethylenimine. 24 hr after transfection,  
424 the media was changed, and cells were checked for fluorescent protein expression (when  
425 applicable) to confirm transfection. 72 hr after transfection, cells were detached and  
426 pelleted. Viral particles were released from producer cells by repeated freeze/thaw cycles  
427 in the presence of Benzonase (100 units). Crude lysates were cleared by centrifugation  
428 and further purified using sucrose gradients. Viral particles in the supernatant were titered  
429 using qPCR with ITR-specific primers. Kanamycin-specific primers were used to confirm  
430 the absence of plasmid DNA after Benzonase treatment.

431

432 *AAV transduction*

433 HEK-293T cells were plated 24 hr prior to transduction at 50,000 cells per well. Cells were  
434 washed with 1x DMEM (no FBS) and AAV diluted in DMEM was added gently on top.  
435 Experiments were performed at  $\sim 1 \times 10^6$  g.c.(genome copies)/cell per virus. 1 hr after  
436 virus addition, 1 ml of D10 was added on top in each well. 24 hr post-transduction, media  
437 was aspirated and 500 µl fresh D10 was added. Cells were incubated a further 48-72 hr  
438 prior to analysis.

439

440 *Data and materials availability*

441 All materials herein are available upon reasonable request.

442

#### 443 *Acknowledgements*

444 We would like to acknowledge the core facilities at the University of Minnesota who  
445 assisted with this work: University Imaging Center (UIC), University Flow Resource  
446 Center (UFRC), and the Viral Vector and Cloning Core (VVCC).

447

#### 448 *Author Contributions*

449 E.J.A. and A.C.Z. conceived idea and designed experiments. E.J.A., A.C.Z., B.L.R.,  
450 C.B.R., A.L.L, and A.T.N. carried out experiments and analyzed data. W.R.G, D.S., and  
451 E.A.H. advised and aided in assembly of the manuscript. E.J.A. authored the manuscript  
452 with input from all authors.

453

#### 454 *Funding*

455 This study was supported by an NIH NIGMS R35 GM119483 grant to W.R.G. E.J.A.,  
456 A.C.Z. and A.L.L. received salary support from a Biotechnology Training Grant NIH  
457 T32GM008347. W.R.G. is a Pew Biomedical Scholar.

458

#### 459 *Competing interests*

460 The authors declare no competing financial interests.

461 **References**

- 462 1. Jinek M, Chylinski K, Fonfara I, et al. A programmable dual-RNA-guided DNA  
463 endonuclease in adaptive bacterial immunity. *Science* 2012;337:816–821. DOI:  
464 10.1126/science.1225829.
- 465 2. Cong L, Ran FA, Cox D, et al. Multiplex Genome Engineering Using CRISPR/Cas  
466 Systems. *Science* 2013;339:819. DOI: 10.1126/science.1231143.
- 467 3. Kakarougkas A, Jeggo PA. DNA DSB repair pathway choice: an orchestrated  
468 handover mechanism. *Br J Radiol* 2014;87:1035. DOI: 10.1259/bjr.20130685.
- 469 4. Komor AC, Kim YB, Packer MS, et al. Programmable editing of a target base in  
470 genomic DNA without double-stranded DNA cleavage. *Nature* 2016;533:420–424.  
471 DOI: 10.1038/nature17946.
- 472 5. Kurt IC, Zhou R, Iyer S, et al. CRISPR C-to-G base editors for inducing targeted  
473 DNA transversions in human cells. *Nat Biotechnol* 2020. DOI: 10.1038/s41587-020-  
474 0609-x.
- 475 6. Zhao D, Li J, Li S, et al. Glycosylase base editors enable C-to-A and C-to-G base  
476 changes. *Nat Biotechnol* 2020. DOI: 10.1038/s41587-020-0592-2.
- 477 7. Anzalone AV, Randolph PB, Davis JR, et al. Search-and-replace genome editing  
478 without double-strand breaks or donor DNA. *Nature* 2019;576:149–157 DOI:  
479 10.1038/s41586-019-1711-4.
- 480 8. van Haasteren J, Li J, Scheideler OJ, et al. The delivery challenge: fulfilling the  
481 promise of therapeutic genome editing. *Nat Biotechnol* 2020;38:845–855. DOI:  
482 10.1038/s41587-020-0565-5.

- 483 9. Ding Q, Strong A, Patel KM, et al. Permanent alteration of PCSK9 with in vivo  
484 CRISPR-Cas9 genome editing. *Circ Res* 2014;115:488–492. DOI:  
485 10.1161/CIRCRESAHA.115.304351.
- 486 10. Dai X, Park JJ, Du Y, et al. One-step generation of modular CAR-T cells with AAV–  
487 Cpf1. *Nat Methods* 2019;16:247–254. DOI: 10.1038/s41592-019-0329-7.
- 488 11. Maeder ML, Stefanidakis M, Wilson CJ, et al. Development of a gene-editing  
489 approach to restore vision loss in Leber congenital amaurosis type 10. *Nat Med*  
490 2019;25:229–233. DOI: 10.1038/s41591-018-0327-9.
- 491 12. Li C, Samulski RJ. Engineering adeno-associated virus vectors for gene therapy.  
492 *Nat Rev Genet* 2020;21:255–272. DOI: 10.1038/s41576-019-0205-4.
- 493 13. Dong JY, Fan PD, Frizzell RA. Quantitative analysis of the packaging capacity of  
494 recombinant adeno-associated virus. *Hum Gene Ther* 1996;7:2101–2012. DOI:  
495 10.1089/hum.1996.7.17-2101.
- 496 14. Ran FA, Cong L, Yan WX, et al. In vivo genome editing using *Staphylococcus*  
497 *aureus* Cas9. *Nature* 2015;520:186–191. DOI: 10.1038/nature14299.
- 498 15. Wang D, Zhang F, Gao G. CRISPR-Based Therapeutic Genome Editing: Strategies  
499 and In Vivo Delivery by AAV Vectors. *Cell* 2020;181:136–150. DOI:  
500 10.1016/j.cell.2020.03.023.
- 501 16. Stevens AJ, Sekar G, Shah NH, et al. A promiscuous split intein with expanded  
502 protein engineering applications. *Proc Natl Acad Sci USA* 2017;114:8538–8543.  
503 DOI: 10.1073/pnas.1701083114.

- 504 17. Villiger L, Grisch-Chan HM, Lindsay H, et al. Treatment of a metabolic liver disease  
505 by in vivo genome base editing in adult mice. *Nat Med* 2018;24:1519–1525. DOI:  
506 10.1038/s41591-018-0209-1.
- 507 18. Levy JM, Yeh W-H, Pendse N, et al. Cytosine and adenine base editing of the brain,  
508 liver, retina, heart and skeletal muscle of mice via adeno-associated viruses. *Nat*  
509 *Biomed Eng* 2020;4:97–110. DOI: 10.1038/s41551-019-0501-5.
- 510 19. Nishimasu H, Cong L, Yan WX, et al. Crystal Structure of *Staphylococcus aureus*  
511 Cas9. *Cell* 2015;162:1113–1126. DOI: 10.1016/j.cell.2015.08.007.
- 512 20. Choi JG, Dang Y, Abraham S, et al. Lentivirus pre-packed with Cas9 protein for  
513 safer gene editing. *Gene Ther* 2016;23:627–633. DOI: 10.1038/gt.2016.27.
- 514 21. Zetsche B, Volz SE, Zhang F. A split-Cas9 architecture for inducible genome editing  
515 and transcription modulation. *Nat Biotechnol* 2015;33:139–142. DOI:  
516 10.1038/nbt.3149.
- 517 22. Truong DJJ, Kühner K, Kühn R, et al. Development of an intein-mediated split–  
518 Cas9 system for gene therapy. *Nucleic Acids Res* 2015;13:6450-6458 DOI:  
519 10.1093/nar/gkv60123.
- 520 23. Zettler J, Schütz V, Mootz HD. The naturally split Npu DnaE intein exhibits an  
521 extraordinarily high rate in the protein trans-splicing reaction. *FEBS Lett*  
522 2009;583:909–914. DOI: 10.1016/j.febslet.2009.02.003.
- 523 24. St. Martin A, Salamango DJ, Serebrenik AA, et al. A panel of eGFP reporters for  
524 single base editing by APOBEC-Cas9 editosome complexes. *Scientific Rep*  
525 2019;9:497. DOI: 10.1038/s41598-018-36739-9.



- 526 25. Yourik P, Fuchs RT, Mabuchi M, et al. Staphylococcus aureus Cas9 is a multiple-  
527 turnover enzyme. *RNA* 2019;25:35–44. DOI: 10.1261/rna.067355.118.
- 528 26. Tang X, Sretenovic S, Ren Q, et al. Plant Prime Editors Enable Precise Gene  
529 Editing in Rice Cells. *Mol Plant* 2020;13:667–670. DOI:  
530 10.1016/j.molp.2020.03.010.
- 531 27. Liu Y, Li X, He S, et al. Efficient generation of mouse models with the prime editing  
532 system. *Cell Discov* 2020;6:27. DOI: 10.1038/s41421-020-0165-z.
- 533 28. Glaser A, McColl B, Vadolas J. GFP to BFP Conversion: A Versatile Assay for the  
534 Quantification of CRISPR/Cas9-mediated Genome Editing. *Mol Ther Nucleic Acids*  
535 2016;5:e334. DOI: 10.1038/mtna.2016.48.
- 536 29. Gisler S, Gonçalves JP, Akhtar W, et al. Multiplexed Cas9 targeting reveals  
537 genomic location effects and gRNA-based staggered breaks influencing mutation  
538 efficiency. *Nat Commun* 2019;10:1598. DOI: 10.1038/s41467-019-09551-w.
- 539 30. Lesueur LL, Mir LM, André FM. Overcoming the Specific Toxicity of Large Plasmids  
540 Electrotransfer in Primary Cells In Vitro. *Mol Ther Nucleic Acids* 2016;5:e291. DOI:  
541 10.1038/mtna.2016.4.
- 542 31. Schellenberger V, Wang C-W, Geething NC, et al. A recombinant polypeptide  
543 extends the in vivo half-life of peptides and proteins in a tunable manner. *Nat*  
544 *Biotechnol* 2009;27:1186–1190. DOI: 10.1038/nbt.1588.
- 545 32. Amet N, Lee H-F, Shen W-C. Insertion of the designed helical linker led to  
546 increased expression of tf-based fusion proteins. *Pharm Res* 2009;26:523–528.  
547 DOI: 10.1007/s11095-008-9767-0.

- 548 33. Lin Q, Zong Y, Xue C, et al. Prime genome editing in rice and wheat. *Nat Biotechnol*  
549 2020;38:582–585. DOI: 10.1038/s41587-020-0455-x.
- 550 34. Wright AV, Sternberg SH, Taylor DW, et al. Rational design of a split-Cas9 enzyme  
551 complex. *Proc Natl Acad Sci USA* 2015;112:2984–2989. DOI:  
552 10.1073/pnas.1501698112.
- 553 35. Dixon AS, Schwinn MK, Hall MP, et al. NanoLuc Complementation Reporter  
554 Optimized for Accurate Measurement of Protein Interactions in Cells. *ACS Chem*  
555 *Biol* 2016;11:400–408. DOI: 10.1021/acscchembio.5b00753.
- 556 36. Richter MF, Zhao KT, Eton E, et al. Phage-assisted evolution of an adenine base  
557 editor with improved Cas domain compatibility and activity. *Nat Biotechnol*  
558 2020;38:883-891. DOI: 10.1038/s41587-020-0453-z.
- 559 37. Huang TP, Zhao KT, Miller SM, et al. Circularly permuted and PAM-modified Cas9  
560 variants broaden the targeting scope of base editors. *Nat Biotechnol* 2019;37:626–  
561 631. DOI: 10.1038/s41587-019-0134-y.
- 562 38. Wang AS, Chen LC, Wu RA, et al. The Histone Chaperone FACT Induces Cas9  
563 Multi-turnover Behavior and Modifies Genome Manipulation in Human Cells. *Mol*  
564 *Cell* 2020;79:221–233.e5. DOI: 10.1016/j.molcel.2020.06.014.
- 565 39. Kim HK, Yu G, Park J, et al. Predicting the efficiency of prime editing guide RNAs in  
566 human cells. *Nat Biotechnol* 2020; DOI: 10.1038/s41587-020-0677-y.
- 567 40. Kleinstiver BP, Prew MS, Tsai SQ, et al. Broadening the targeting range of  
568 *Staphylococcus aureus* CRISPR-Cas9 by modifying PAM recognition. *Nat*  
569 *Biotechnol* 2015;33:1293–1298. DOI: 10.1038/nbt.3404.

- 570 41. Zdechlik AC, He Y, Aird EJ, et al. Programmable Assembly of Adeno-Associated  
571 Virus–Antibody Composites for Receptor-Mediated Gene Delivery. *Bioconjug Chem*  
572 2020;31:1093–1106. DOI: 10.1021/acs.bioconjchem.9b00790.
- 573 42. Matreyek KA, Stephany JJ, Chiasson MA, et al. An improved platform for functional  
574 assessment of large protein libraries in mammalian cells. *Nucleic Acids Res*  
575 2020;48:e1. DOI: 10.1093/nar/gkz910.
- 576 43. Clement K, Rees H, Canver MC, et al. CRISPResso2 provides accurate and rapid  
577 genome editing sequence analysis. *Nat Biotechnol* 2019;37:224–226. DOI:  
578 10.1038/s41587-019-0032-3.  
579

580 **Figure Legends**

581

582 **Figure 1 Enabling precise genome modifications using a split *S. aureus* prime**

583 **editor. (a)** Schematic of both full-length *S. aureus* prime editor (SaPE) and split SaPE

584 (sSaPE). **(b)** Western blot of plasmid-based expression of three different versions of

585 sSaPE. Successful trans intein splicing is denoted by the arrow next to the higher

586 molecular weight band. **(c)** Model system for analyzing editing by SaPE using a

587 GFP(L202S) stable reporter line to restore GFP fluorescence. A single point mutation (G

588 to A) that lies within SaPE's PAM is required. The antisense DNA sequence is shown. **(d)**

589 Representative fluorescence microscopy images of unedited (-PE) and edited (+PE)

590 HEK-293T stably expressing the GFP(L202S)-2A-mKate2 reporter. Scale bar = 20  $\mu$ m.

591 **(e)** Quantitation of prime editing in HEK-293T cells using flow cytometry. *S. pyogenes*

592 prime editor (SpPE) is compared to full-length SaPE, N-terminally fused RT-nSaCas9

593 (PESa), and three versions (v1-v3) of sSaPE. No pegRNA corresponds to transfection of

594 SaPE only. Data are representative of multiple independent experiments. **(f)** Targeting of

595 *GFP(L202S)* reversion with pegRNAs of differing 3' extension lengths (PBS = primer

596 binding site). **(g)** GFP to BFP editing in HEK-293 cells stably expressing wildtype GFP.

597 Individual data points represent biological replicates.

598

599 **Figure 2 SaPE is capable of diverse edit types across various genomic loci. (a-f)**

600 Next-generation sequencing readouts of targeting of SaPE and sSaPEv3 to indicated loci

601 **(a)** *EMX1*, **(b)** *FANCF*, **(c)** *DNMT3B*, **(d)** *RUNX1*, and **(e,f)** *HEK3* with differing edit types

602 and pegRNA architectures. **(f)** contains the same 5mer deletion series data as **(e)**, but

603 with a scaled y-axis.

604

605 **Figure 3 Split NanoLuc substitutes as an effective dimerization domain and**  
606 **visualization tool.** (a) Diagram of sSaPE-split NanoLuc (sNL) (not to scale). (b)  
607 Composite image of stable GFP(L202S)-2A-mKate2 HEK-293T cells transfected with  
608 sSaPE-sNL. Colors are as follows: red = mKate2; blue = NanoLuc; green = GFP. Scale  
609 bar = 120  $\mu$ m. (c) Prime editing rates at *GFP(L202S)* locus in HEK-293T cells. (d)  
610 Western blot of co-transfection of indicated versions of split SaPE. Only the N-terminal  
611 fragment is FLAG labeled. The top band corresponds to covalently recombined SaPE.

612

613 **Figure 4 Packaging of split SaPE into AAV.** (a) Scheme of different layouts of sSaPE  
614 in AAV genome with indicated sizes of expression cassettes. (b) Plasmid-based prime  
615 editing of SaPE encoded in AAV plasmids. Version 3.2-sNL corresponds to sNanoLuc  
616 replacing Npu intein. (c) Western blot of HEK-293T cells transduced with the indicated  
617 virus(es) for 3 or 5 days. Only the N-terminal fragment is FLAG labeled. (d) Co-  
618 transduction of AAVs expressing sSaPEv3 at the indicated multiplicity of infections  
619 (genome copies / cell) targeting *GFP(L202S)*. (e) Bioluminescence microscopy images  
620 of co-transduced AAV-sSaPEv3-sNanoLuc in U2-OS cells after 4 days.

## Figure 1

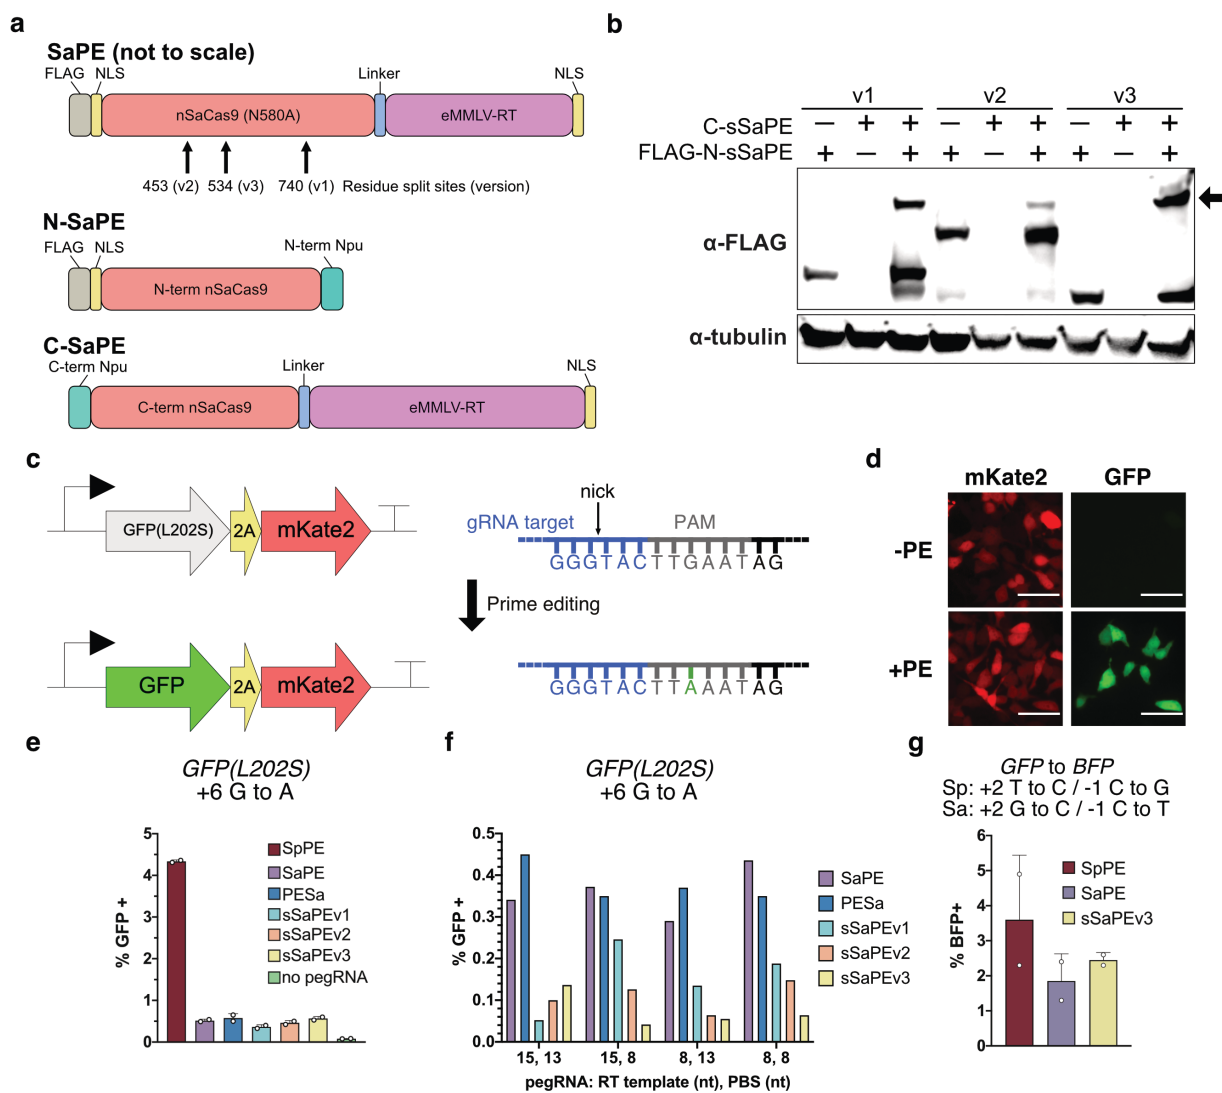

## Figure 2

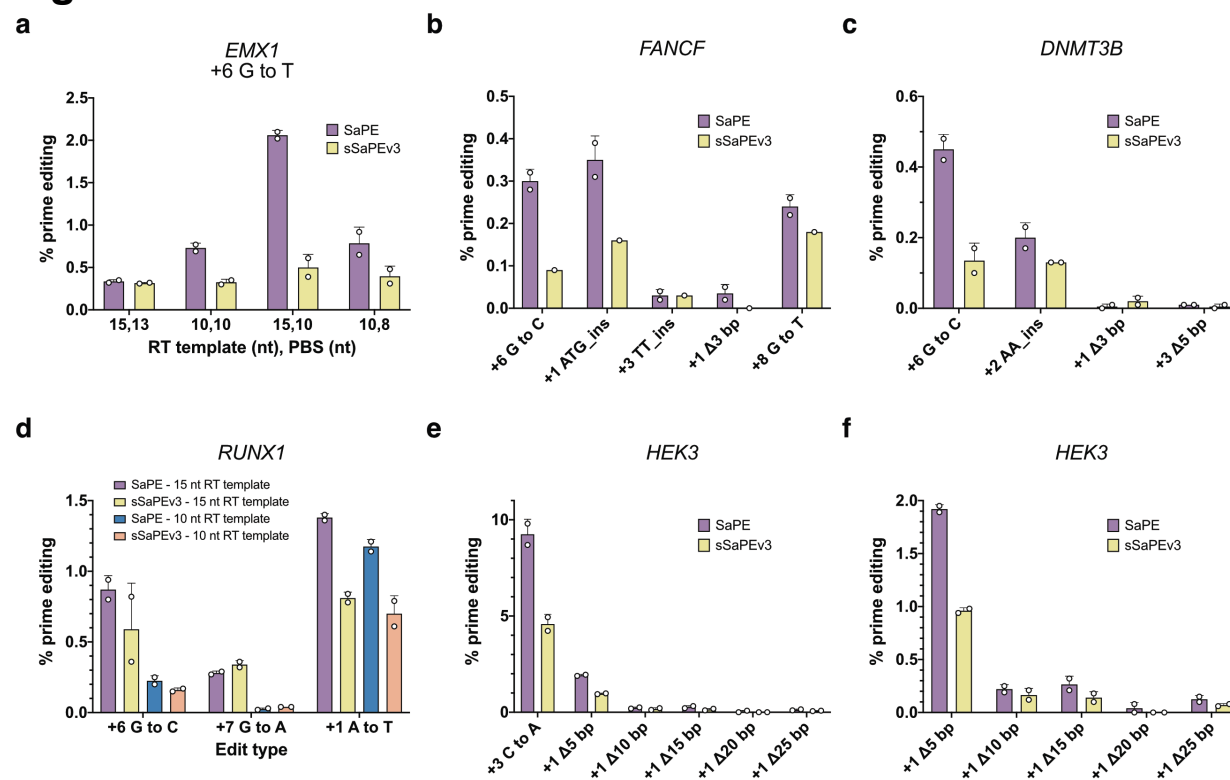

## Figure 3

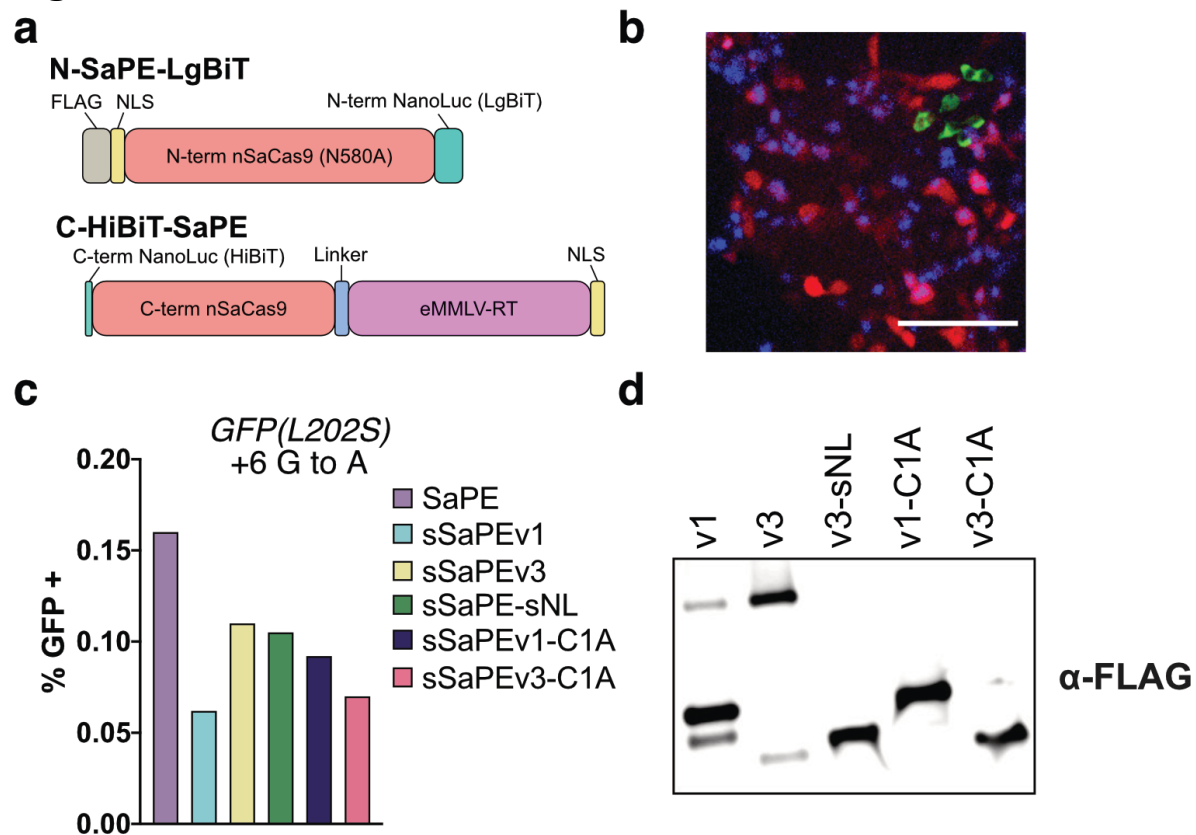



## Figure 4

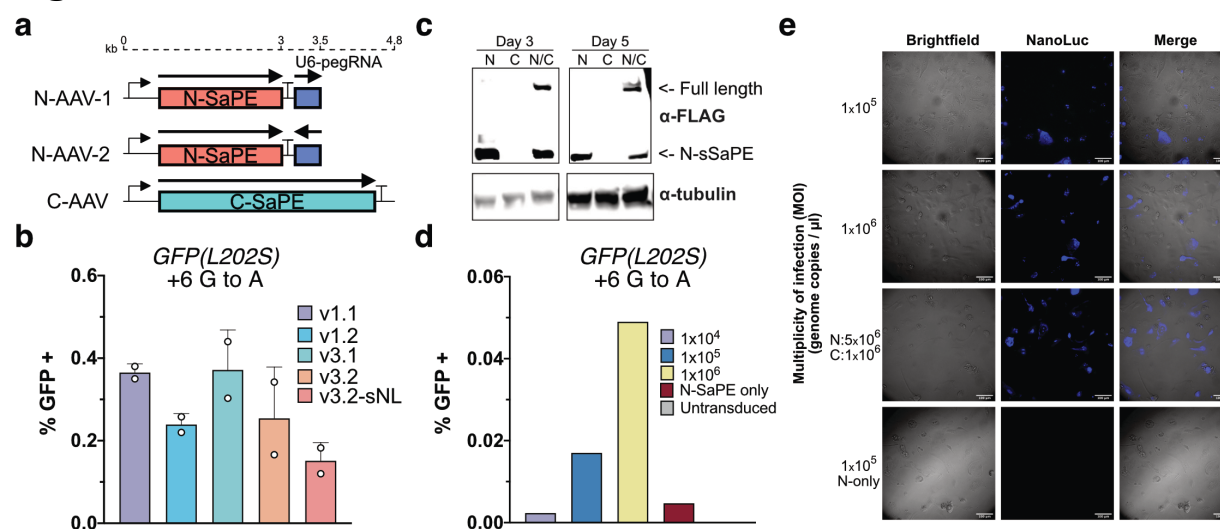

Source: https://www.biorxiv.org/content/biorxiv/early/2021/01/11/2021.01.11.426237.full.pdf
